# Supplementary material for: Human Rhinoviruses in Pediatric Patients in a Tertiary Care Hospital in Germany: Molecular Epidemiology and Clinical Significance
Source: MDPI journal article supplement (doi:10.3390/v14081829), 2022-08-20
Supplement: s1 [file s1]

# Human Rhinoviruses in Pediatric Patients in a Tertiary Care Hospital in Germany: Molecular Epidemiology and Clinical Significance

Franziska Neugebauer, Sandra Berge, Uwe Gerd Liebert and Mario Hönemann

## Supplementary Material

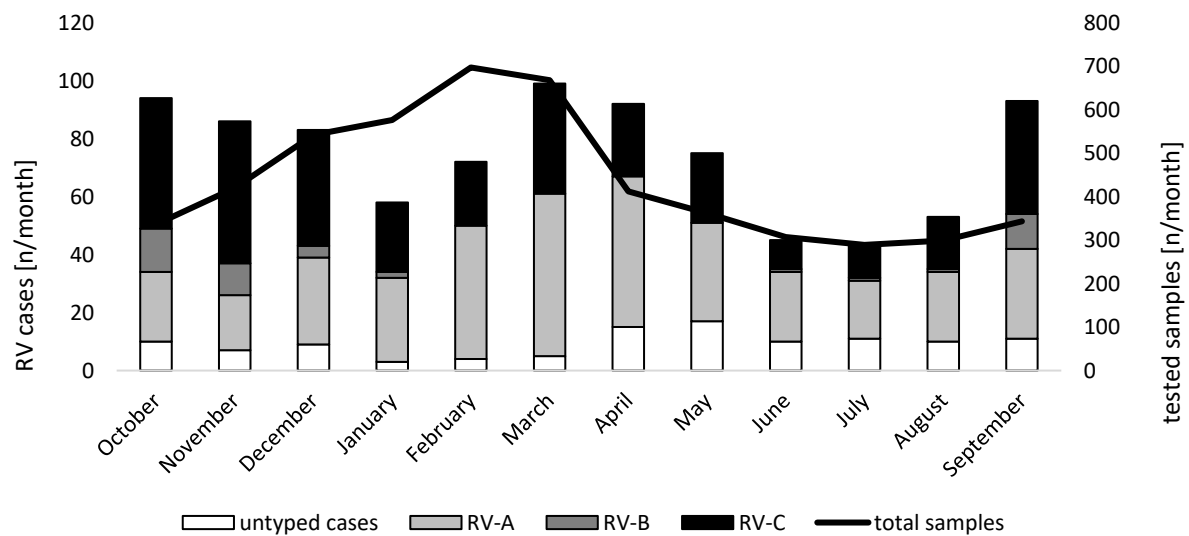

**Figure S1: Combined Monthly total numbers of tested samples and rhinovirus cases.** Combined Monthly total numbers of tested samples and rhinovirus cases (n = 776) from 2013 to 2017 stratified by species A, B, and C, as well as untypable rhinoviruses. Note the two different y-axes: the left axis shows the absolute numbers of detected Rhinovirus A, Rhinovirus B, and Rhinovirus C cases, as well as the absolute numbers of untyped cases, while the right axis shows the absolute number of tested samples.

**Table S1.** Primers and Probes used for Rhinovirus detection.

| Primer/Probe                        | Sequence                                         |
|-------------------------------------|--------------------------------------------------|
| Primer HRV-LNA-for (forward, 14 nt) | 5'- CY+ AGC C+T GCG TGG C -3                     |
| Primer HRV-rev (reverse, 21 nt)     | 5'- GAA ACA CGG ACA CCC AAA GTA -3               |
| Taqman-Probe HRV-Taq-FAM (22 nt)    | 5'- 6FAM- TCC TCC GGC CCC TGA ATG YGG C-BHQ1 -3' |

FAM= FL= Fluorescein; BHQ= Black Hole Quencher=Dark Quencher, primer concentration: 10 pmol/μl, probe concentration: 4 pmol/μl.

**Table S2.** Reagent concentration for Rhinovirus detection.

| Reagent                 | Concentration            | Volume  | Final Concentration | Company           |
|-------------------------|--------------------------|---------|---------------------|-------------------|
| H <sub>2</sub> O        |                          | 1,7 µl  |                     | QIAGEN            |
| 2x Fast MP RT-PCR<br>MM | 2x(+Mg Cl <sub>2</sub> ) | 10,0 µl | 1x                  | QIAGEN            |
| HRV-LNA-for             | 10 pmol/µl               | 0,8 µl  | 0,4 µM              | Metabion          |
| HRV-rev                 | 10 pmol/µl               | 0,8 µl  | 0,4 µM              | Metabion          |
| HRV-Taq-FAM             | 4 pmol/µl                | 1,0 µl  | 0,2 µM              | TibMolBiol        |
| Fast RT Mix             |                          | 0,2 µl  |                     | QIAGEN            |
| RNase Inhibitor         | 40 Units/µl              | 0,5 µl  | 20 Units            | Thermo Scientific |
| RNA                     |                          | 5,0 µl  |                     |                   |

Reagent concentrations and volumes used for Rhinovirus detection.

**Table S3.** Cycling conditions for Rhinovirus detection.

| Step                    | Temperature | Duration   | Ramp Rate | Mode            |           |
|-------------------------|-------------|------------|-----------|-----------------|-----------|
| RT                      | 50°C        | 20:00 min. | 20.00°C/s | None            |           |
| Denaturation/Activation | 95°C        | 5:00 min.  | 20.00°C/s | None            |           |
| Amplification           | 95°C        | 0:15 min.  | 20.00°C/s | None            | 45 Cycles |
|                         | 56°C        | 0:10 min.  | 20.00°C/s | None            |           |
|                         | 60°C        | 0:30 min.  | 20.00°C/s | Single(530) nm) |           |
| Cooling                 | 40°C        | 0:30 min.  | 20.00°C/s | None            |           |

The amplification was performed on a Light Cycler 2.0 Instrument (Roche).
